1 **Genome-wide haplotype-based association analysis of major depressive disorder**  
2 **in Generation Scotland and UK Biobank**

3  
4 David M. Howard Ph.D.\*<sup>1</sup>, Lynsey S. Hall Ph.D.<sup>1</sup>, Jonathan D. Hafferty M.D.<sup>1</sup>, Yanni Zeng Ph.D.<sup>1,2</sup>,  
5 Mark J. Adams Ph.D.<sup>1</sup>, Toni-Kim Clarke Ph.D.<sup>1</sup>, David J. Porteous Ph.D.<sup>3</sup>, Reka Nagy BSc<sup>2</sup>,  
6 Caroline Hayward Ph.D.<sup>2,8</sup>, Blair H. Smith Ph.D.<sup>4,8</sup>, Alison D. Murray Ph.D.<sup>5,8</sup>, Niamh M. Ryan  
7 Ph.D.<sup>3</sup>, Kathryn L. Evans Ph.D.<sup>3,7</sup>, Chris S. Haley Ph.D.<sup>2</sup>, Ian J. Deary Ph.D.<sup>6,7,8</sup>, Pippa A. Thomson  
8 Ph.D.<sup>3,7</sup> and Andrew M. McIntosh M.D.<sup>1,7,8</sup>

9  
10 Running Title: Haplotype-based association analysis of depression

11  
12 Affiliations:

13 <sup>1</sup>Division of Psychiatry, University of Edinburgh, Royal Edinburgh Hospital, Edinburgh, UK

14 <sup>2</sup>Medical Research Council Human Genetics Unit, Institute of Genetics and Molecular Medicine,  
15 University of Edinburgh, Edinburgh, UK

16 <sup>3</sup>Centre for Genomic and Experimental Medicine, Institute of Genetics and Molecular Medicine,  
17 University of Edinburgh, Edinburgh, UK

18 <sup>4</sup>Division of Population Health Sciences, University of Dundee, Dundee, UK

19 <sup>5</sup>Aberdeen Biomedical Imaging Centre, University of Aberdeen, Aberdeen, UK

20 <sup>6</sup>Department of Psychology, The University of Edinburgh, Edinburgh, UK

21 <sup>7</sup>Centre for Cognitive Ageing and Cognitive Epidemiology, The University of Edinburgh, Edinburgh,  
22 UK

23 <sup>8</sup>Generation Scotland, Institute of Genetics and Molecular Medicine, University of Edinburgh,  
24 Edinburgh, UK

25 \*Corresponding author: David M. Howard

26 Division of Psychiatry, University of Edinburgh, Royal Edinburgh Hospital, Edinburgh, UK

27 +44 131 537 6268

28 (e-mail: D.Howard@ed.ac.uk)

29 Keywords: Haplotype association analysis; Major Depressive Disorder; 6q21; Depression; Generation  
30 Scotland; UK Biobank

31  
32  
33  
34  
35  
36  
37

38 **ABSTRACT**

39 Genome-wide association studies using genotype data have had limited success in the identification of  
40 variants associated with major depressive disorder (MDD). Haplotype data provide an alternative  
41 method for detecting associations between variants in weak linkage disequilibrium with genotyped  
42 variants and a given trait of interest. A genome-wide haplotype association study for MDD was  
43 undertaken utilising a family-based population cohort, Generation Scotland: Scottish Family Health  
44 Study (n = 18 773), as a discovery cohort with UK Biobank used as a population-based cohort  
45 replication cohort (n = 25 035). Fine mapping of haplotype boundaries was used to account for  
46 overlapping haplotypes potentially tagging the same causal variant. Within the discovery cohort, two  
47 haplotypes exceeded genome-wide significance ( $P < 5 \times 10^{-8}$ ) for an association with MDD. One of  
48 these haplotypes was nominally significant in the replication cohort ( $P < 0.05$ ) and was located in  
49 6q21, a region which has been previously associated with bipolar disorder, a psychiatric disorder that  
50 is phenotypically and genetically correlated with MDD. Several haplotypes with  $P < 10^{-7}$  in the  
51 discovery cohort were located within gene coding regions associated with diseases that are comorbid  
52 with MDD. Using such haplotypes to highlight regions for sequencing may lead to the identification  
53 of the underlying causal variants.

54 **INTRODUCTION**

55 Major depressive disorder (MDD) is a complex and clinically heterogeneous condition with core  
56 symptoms of low mood and/or anhedonia over a period of at least two weeks. MDD is frequently  
57 comorbid with other clinical conditions, such as cardiovascular disease,<sup>1</sup> cancer<sup>2</sup> and inflammatory  
58 diseases.<sup>3</sup> This complexity and comorbidity suggests heterogeneity of aetiology and may explain why  
59 there has been limited success in identifying causal genetic variants,<sup>4-7</sup> despite heritability estimates  
60 ranging from 28% to 37%.<sup>8, 9</sup> Single nucleotide polymorphism (SNP)-based analyses are unlikely to  
61 fully capture the variation in regions surrounding the genotyped markers, including untyped lower-  
62 frequency variants and those that are in weak linkage disequilibrium (LD) with the common SNPs on  
63 many genotyping arrays.

64 Haplotype-based analysis may help improve the detection of causal genetic variants as, unlike single  
65 SNP-based analysis, it is possible to assign the strand of sequence variants and combine information  
66 from multiple SNPs to identify rarer causal variants. A number of studies<sup>10-12</sup> have identified  
67 haplotypes associated with MDD, albeit by focussing on particular regions of interest. In the current  
68 study, a family and population-based cohort Generation Scotland: Scottish Family Health Study  
69 (GS:SFHS) was utilised to ascertain genome-wide haplotypes in closely and distantly related  
70 individuals.<sup>13</sup> A haplotype-based association analysis was conducted using MDD as a phenotype,  
71 followed by additional fine-mapping of haplotype boundaries with a replication and meta-analysis  
72 performed using the UK Biobank cohort.<sup>14</sup>

## 73 MATERIALS AND METHODS

### 74 Discovery cohort

75 The discovery phase of the study used the family and population-based Generation Scotland: Scottish  
76 Family Health Study (GS:SFHS) cohort,<sup>13</sup> consisting of 23 960 individuals of whom 20 195 were  
77 genotyped with the Illumina OmniExpress BeadChip (706 786 SNPs). Individuals with a genotype  
78 call rate < 98% were removed, as well as those SNPs with a call rate < 98%, a minor allele frequency  
79 (MAF) < 0.01 or those deviating from Hardy-Weinberg equilibrium ( $P < 10^{-6}$ ). Individuals who were  
80 identified as population outliers through principal component analyses of their genotypic information  
81 were also removed.<sup>15</sup>

82 Following quality control there were 19 904 GS:SFHS individuals (11 731 females and 8 173 males)  
83 that had genotypic information for 561 125 autosomal SNPs. These individuals ranged from 18-99  
84 years of age with an average age of 47.4 years and a standard deviation of 15.0 years. There were 4  
85 933 families that had at least two related individuals, this included 1 799 families with two members,  
86 1 216 families with three members and 829 families with four members. The largest family group  
87 consisted of 31 related individuals and there were 1 789 individuals that had no other family members  
88 within GS:SFHS.

### 89 Replication cohort

90 The population-based UK Biobank<sup>16</sup> (provided as part of project #4844) was used as a replication  
91 cohort to assess those haplotypes within GS:SFHS with  $P < 10^{-6}$ . The UK Biobank data consisted of  
92 152 249 individuals with genomic data for 72 355 667 imputed variants.<sup>17</sup> The SNPs genotyped in  
93 GS:SFHS were extracted from the UK Biobank data and those variants with an imputation info score  
94  $< 0.8$  were removed, leaving 555 782 variants in common between the two cohorts. Those genotyped  
95 individuals listed as non-white British and those that had also participated in GS:SFHS were removed  
96 from within UK Biobank, leaving a total of 119 955 individuals.

### 97 **Genotype phasing and haplotype formation**

98 The genotype data for GS:SFHS and UK Biobank was phased using SHAPEIT v2.r837.<sup>18</sup> Genome-  
99 wide phasing was conducted on the GS:SFHS cohort, whilst the phasing of UK Biobank was  
100 conducted on a 50Mb window centred on those haplotypes identified within GS:SFHS with  $P < 10^{-6}$ .  
101 The relatedness within GS:SFHS made it suitable for the application of the duoHMM method, which  
102 improves phasing accuracy by also incorporating family information.<sup>19</sup> The default window size of  
103 2Mb was used for UK Biobank and a 5Mb window was used for GS:SFHS as larger window sizes  
104 have been demonstrated to be beneficial when there is increased identity by descent (IBD) in the  
105 population.<sup>18</sup> The number of conditioning states per SNP was increased from the default of 100 states  
106 to 200 states to improve phasing accuracy, with the default effective population size of 15 000 used.  
107 To calculate the recombination rates between SNPs during phasing the HapMap phase II b37<sup>20</sup> was  
108 used. This build was also used to partition the phased data into haplotypes.

109 Three window sizes (1cM, 0.5cM and 0.25cM) were used to establish the SNPs that formed each  
110 haplotype.<sup>21</sup> Each window was then moved along the genome by a quarter of the respective window  
111 size. There were a total of 97 333 windows with a mean number of SNPs per window of 157, 79 and  
112 34 for the 1cM, 0.5cM and 0.25cM windows, respectively. Windows that were less 5 SNPs in length  
113 were removed. Within each window, those haplotypes that had a minor allele frequency  $< 0.005$  or  
114 that deviating from Hardy-Weinberg equilibrium ( $P < 10^{-6}$ ) were not tested for association. However,  
115 they were included within the alternative haplotype when assessing the remaining 2 618 094

116 haplotypes. The reported haplotype positions relate to the outermost SNPs within each haplotype are  
117 in base pair (bp) position according to GRCh37.

118 To approximate the number of independently segregating haplotypes the clump command within  
119 Plink v1.90<sup>22</sup> was applied. This provides an estimation of the Bonferroni correction required for  
120 multiple testing. When applying an LD  $r^2$  threshold of  $< 0.4$  there were 1 070 216 independently  
121 segregating haplotypes within GS:SFHS, equating to a  $P$ -value  $< 5 \times 10^{-8}$  for genome-wide  
122 significance. This threshold is also frequently applied to SNP-based and sequence-based association  
123 studies to account for multiple testing.<sup>23</sup>

#### 124 **Phenotype ascertainment and patient linkage**

125 Discovery cohort

126 Within GS:SFHS a diagnosis of MDD was made using initial screening questions and the Structured  
127 Clinical Interview for the Diagnostic and Statistical Manual of Mental Disorders (SCID).<sup>24</sup> The SCID  
128 is an internationally validated approach to identifying episodes of depression and was conducted by  
129 clinical nurses trained in its administration. Further details regarding this diagnostic assessment have  
130 been described previously.<sup>25</sup> In this study, MDD was defined by at least one instance of a major  
131 depressive episode which initially identified 2 659 cases, 17 237 controls and 98 missing (phenotype  
132 unknown) individuals.

133 In addition, the psychiatric history of cases and controls was examined using record linkage to the  
134 Scottish Morbidity Record.<sup>26</sup> Within the control group, 1 072 participants were found to have attended  
135 at least one psychiatry outpatient clinic and were excluded from the study. In addition, 47 of the MDD  
136 cases were found to have additional diagnoses of either bipolar disorder or schizophrenia in  
137 psychiatric inpatient records and were also excluded from the study. These participants had given  
138 prior consent for anonymised record linkage to routine administrative clinical data.

139 In total there were 2 605 MDD cases and 16 168 controls following the removal of individuals based  
140 on patient records and population stratification, equating to a prevalence of 13.9% for MDD in this  
141 cohort.

142 Replication Cohort

143 Within the UK Biobank cohort, 25 035 participants completed a touchscreen assessment of depressive  
144 symptoms and previous treatment. On the basis of their responses, diagnostic status was defined as  
145 either ‘probable single lifetime episode of major depression’ or ‘probable recurrent major depression  
146 (moderate and severe)’ and with control status defined as ‘no mood disorder’. In total there were 8  
147 508 cases and 16 527 controls, equating to a trait prevalence of 34.0% in this cohort, after the removal  
148 of individuals with insufficient information or ambiguous phenotypes.<sup>14</sup>

149 **Statistical approach**

150 Discovery cohort

151 A mixed linear model was used to conduct an association analysis using GCTA v1.25.0<sup>27</sup>:

152 
$$\mathbf{y} = \mathbf{X}\boldsymbol{\beta} + \mathbf{Z}_1\mathbf{u} + \mathbf{Z}_2\mathbf{v} + \boldsymbol{\varepsilon}$$

153 where  $\mathbf{y}$  was the vector of binary observations for MDD.  $\boldsymbol{\beta}$  was the matrix of fixed effects, including  
154 haplotype, sex, age and age<sup>2</sup>.  $\mathbf{u}$  was fitted as a random effect taking into account the genomic  
155 relationships (MVN  $(0, \mathbf{G}\boldsymbol{\sigma}_u^2)$ , where  $\mathbf{G}$  was a SNP-based genomic relationship matrix<sup>28</sup>).  $\mathbf{v}$  was a  
156 random effect fitting a second genomic relationship matrix  $\mathbf{G}_t$  (MVN  $(0, \mathbf{G}_t\boldsymbol{\sigma}_v^2)$  which modelled only  
157 the more closely related individuals.<sup>29</sup>  $\mathbf{G}_t$  was equal to  $\mathbf{G}$  except that off-diagonal elements  $< 0.05$   
158 were set to 0.  $\mathbf{X}$ ,  $\mathbf{Z}_1$  and  $\mathbf{Z}_2$  were the corresponding incidence matrices.  $\boldsymbol{\varepsilon}$  was the vector of residual  
159 effects and was assumed to be normally distributed, MVN  $(0, \mathbf{I}\boldsymbol{\sigma}_\varepsilon^2)$ .

160 The inclusion of the second genomic relationship matrix,  $\mathbf{G}_t$ , was deemed desirable as the fitting of  
161 the single matrix  $\mathbf{G}$  alone resulted in significant population stratification (intercept =  $1.029 \pm 0.003$ ,  
162  $\lambda_{GC} = 1.026$ ) following examination with LD score regression.<sup>30</sup> The fitting of both genomic  
163 relationship matrices simultaneously produced no evidence of bias due to population stratification  
164 (intercept =  $1.002 \pm 0.003$ ,  $\lambda_{GC} = 1.005$ ).

165 Replication cohort

166 A mixed linear model was used to assess the haplotypes in UK Biobank which were identified in the  
167 discovery cohort with  $P < 10^{-6}$  using GCTA v1.25.0<sup>27</sup>:

$$168 \quad \mathbf{y} = \mathbf{X}\boldsymbol{\beta} + \mathbf{Z}_1\mathbf{u} + \boldsymbol{\varepsilon}$$

169 where  $\mathbf{y}$  was the vector of binary observations for MDD.  $\boldsymbol{\beta}$  was the matrix of fixed effects, including  
170 haplotype, sex, age, age<sup>2</sup>, genotyping batch and recruitment centre.  $\mathbf{u}$  was fitted as a random effect  
171 taking into account the SNP-based genomic relationships (MVN ( $0, \mathbf{G}\boldsymbol{\sigma}_u^2$ )).  $\mathbf{X}$  and  $\mathbf{Z}_1$  were the  
172 corresponding incidence matrices and  $\boldsymbol{\varepsilon}$  was the vector of residual effects and was assumed to be  
173 normally distributed, MVN ( $0, \mathbf{I}\boldsymbol{\sigma}_\varepsilon^2$ ).  $\boldsymbol{\sigma}_\varepsilon^2$ ). Replication success was judged on the statistical  
174 significance of each haplotype using an inverse variance-weighted meta-analysis across both cohorts  
175 conducted using Metal.<sup>31</sup>

176 Fine mapping

177 The method described above examines the effect of each haplotype against all other haplotypes in that  
178 window. Therefore, a haplotype could be assessed against similar haplotypes containing the same  
179 causal variant, limiting any observed phenotypic association. To investigate whether there were causal  
180 variants located within directly overlapping haplotypes of the same window size, fine mapping of  
181 haplotype boundaries was used. Where there were directly overlapping haplotypes, each with  $P < 10^{-3}$   
182 and with an effect in the same direction, i.e. both causal or both preventative, then any shared  
183 consecutive regions formed a new haplotype that was assessed using the mixed model described

184 previously. This new haplotype was assessed using all individuals and was required to be at least 5  
185 SNPs in length. A total of 47 new haplotypes were assessed from within 26 pairs of directly  
186 overlapping haplotypes.

## 187 **RESULTS**

188 An association analysis for MDD was conducted using 2 618 094 haplotypes and 47 fine mapped  
189 haplotypes within the discovery cohort, GS:SFHS. A genome-wide Manhattan plot of  $-\log_{10} P$ -values  
190 for these haplotypes is provided in Figure 1 with a q-q plot provided in Supplementary Figure S1.  
191 Within the discovery cohort, two haplotypes exceeded genome-wide significance ( $P < 5 \times 10^{-8}$ ) for an  
192 association with MDD, one located on chromosome 6 and the other located on chromosome 10. There  
193 were 12 haplotypes with  $P < 10^{-6}$  in the discovery cohort with replication sought for these haplotypes  
194 using UK Biobank. Summary statistics from both cohorts and the meta-analysis for these 12  
195 haplotypes are provided in Table 1. The protein coding genes which overlap these 12 haplotypes  
196 along with the observed haplotype frequencies within the two cohorts are provided in Table 2. The  
197 SNPs and alleles that constitute these 12 haplotypes are provided in Supplementary Table S1.

198 The two haplotypes on chromosome 6 ( $LD r^2 = 0.74$ ) with  $P < 10^{-6}$  in the discovery cohort both  
199 achieved nominal significance ( $P < 0.05$ ) in the replication cohort, with one reaching genome-wide  
200 significance ( $P < 5 \times 10^{-8}$ ) in the meta-analysis. A regional association plot of the region surrounding  
201 these haplotypes within GS:SFHS is provided in Figure 2. Fine mapping was used to form the most  
202 significant haplotype within the discovery cohort. Two directly overlapping 0.5cM haplotypes  
203 consisting of 28 SNPs were identified between 108 335 345 and 108 454 437 bp (rs7749081 -  
204 rs212829). These two haplotypes had  $P$ -values of  $3.24 \times 10^{-5}$  and  $5.57 \times 10^{-5}$ , respectively and differed  
205 at a single SNP (rs7749081). Exclusion of this single SNP defined a new 27 SNP haplotype that had a  
206 genome-wide significant association with MDD ( $P = 7.06 \times 10^{-9}$ ). Calculating the effect size at the  
207 population level,<sup>32</sup> the estimates of the contribution of the two haplotypes to the total genetic variance  
208 was  $2.09 \times 10^{-4}$  and  $2.38 \times 10^{-4}$ , respectively, within GS:SFHS. None of the individual SNPs located  
209 within either haplotype were associated with MDD in either cohort ( $P \geq 0.05$ ).



210 A genome-wide significant haplotype ( $P = 8.50 \times 10^{-9}$ ) was identified on chromosome 10 within  
211 GS:SFHS using a 0.5cM window. A regional association plot of the region surrounding this haplotype  
212 is provided in Figure 3. This haplotype had an odds ratio (OR) of 2.33 (95% CI: 1.83 – 2.91) in the  
213 discovery cohort and an OR of 1.15 (95% CI: 0.80 - 1.59) in the replication cohort. These were the  
214 highest ORs observed in the respective cohorts. The estimate of the contribution of this haplotype to  
215 the total genetic variance was  $2.29 \times 10^{-4}$  in the discovery cohort. Association analysis of the 92 SNPs  
216 on this haplotype revealed that one SNP in GS:SFHS (rs17133585) and two SNPs in UK Biobank  
217 (rs12413638 and rs10904290) were nominally significant ( $P < 0.05$ ), although none had  $P$ -values  $<$   
218 0.001.

219 All 12 of the haplotypes with a  $P$ -value for association  $< 10^{-6}$  in the GS:SFHS discovery cohort were  
220 risk factors for MDD (OR  $> 1$ ) and within the replication cohort, 7 out of these 12 haplotypes had OR  
221  $> 1$ . None of the 95% confidence intervals for the replication ORs overlapped the 95% confidence  
222 intervals of the discovery GS:SFHS cohort.

## 223 **DISCUSSION**

224 Twelve haplotypes were identified in the discovery cohort with  $P < 10^{-6}$  of which two were significant  
225 at the genome-wide level ( $P < 5 \times 10^{-8}$ ) in the discovery cohort and one which was genome-wide  
226 significant ( $P < 5 \times 10^{-8}$ ) in the meta-analysis. A power analysis<sup>33</sup> was conducted using the genotype  
227 relative risks observed in the discovery cohort, the sample sizes and haplotype frequencies in the  
228 replication cohort and the prevalence of MDD reported for a structured clinical diagnosis of MDD in  
229 other high income counties (14.6%).<sup>34</sup> There was sufficient power ( $> 0.99$ ) to detect the twelve  
230 haplotypes with  $P < 10^{-6}$  identified in the discovery cohort within the replication cohort at a  
231 significance threshold of 0.05%.

232 A complementary approach to replication is to identify the gene coding regions within haplotypes that  
233 potentially provide a biologically informative explanation for an association with MDD. Those  
234 haplotypes with  $P < 10^{-7}$  in the discovery cohort and the gene coding regions that they overlap are  
235 discussed below.

236 The two haplotypes on chromosome 6 overlapped with the Osteopetrosis Associated Transmembrane  
237 Protein 1 (*OSTMI*) coding gene. *OSTMI* is associated with neurodegeneration<sup>35, 36</sup> and melanocyte  
238 function,<sup>37</sup> and alpha-melanocyte stimulating hormone has been shown to have an effect on  
239 depression-like symptoms.<sup>38-40</sup> This haplotype lies within the 6q21 region that has been associated  
240 with bipolar disorder,<sup>41-45</sup> a disease that shares symptoms with MDD and has a correlated phenotypic  
241 liability of 0.64.<sup>46</sup> This may indicate either a pleiotropic effect or clinical heterogeneity, whereby  
242 patients may be misdiagnosed, i.e. patients may have MDD and transition to bipolar disorder in the  
243 future or are sub-threshold for bipolar disorder and instead given a diagnosis of MDD.

244 The haplotype identified on chromosome 8 overlapped with the Interleukin 7 (*IL7*) protein coding  
245 region. *IL7* is involved in maintaining T cell homeostasis<sup>47</sup> and proliferation,<sup>48</sup> which in turn  
246 contributes to the immune response to pathogens. It has been proposed that impaired T cell function  
247 may be a factor in the development of MDD,<sup>49</sup> with depressed subjects found to have elevated<sup>50</sup> or  
248 depressed levels<sup>51</sup> of *IL7* serum. There is conjecture as to whether MDD causes inflammation or  
249 represents a reaction to an increased inflammatory response,<sup>52, 53</sup> but it is most likely to be a  
250 bidirectional relationship.<sup>51</sup>

251 The haplotype on chromosome 10 overlapped with two RNA genes: long intergenic non-protein  
252 coding RNA 704 (*LINC00704*) and long intergenic non-protein coding RNA 705 (*LINC00705*). The  
253 function of these non-protein coding genes is unreported. However, a study of cardiac neonatal lupus  
254 which is a rare autoimmune disease demonstrated an association for a SNP (rs1391511) which is 15kb  
255 from *LINC00705*.

256 Two Dutch studies<sup>54, 55</sup> have identified a variant (rs8023445) on chromosome 15 located within the  
257 SRC (Src homology 2 domain containing) family, member 4 (*SHC4*) gene coding region that has a  
258 moderate degree of association with MDD ( $P = 1.64 \times 10^{-5}$  and  $P = 9 \times 10^{-6}$ , respectively). A variant  
259 (rs10519201) within the *SHC4* coding region was also found to have an association ( $P = 6.16 \times 10^{-6}$ )  
260 with Obsessive-Compulsive Personality Disorder in a UK-based study.<sup>56</sup> *SHC4* is expressed in  
261 neurons<sup>57</sup> and regulates BDNF-induced MAPK activation,<sup>58</sup> which has been shown to be a key factor

262 in MDD pathophysiology.<sup>59</sup> The *SHC4* region overlaps with the haplotype on chromosome 15  
263 identified in the discovery cohort (located at 49 206 902 – 49 260 601 bp) and therefore further  
264 research to examine the association between the *SHC4* region and psychiatric disorders could be  
265 warranted.

266 Haplotype-based analyses are capable of tagging variants due to the LD between the untyped variants  
267 and the multiple flanking genotyped variants which make up the inherited haplotype. This approach  
268 should provide greater power when there is comparatively higher IBD sharing, such as in GS:SFHS,  
269 where there is a greater likelihood that a single haplotype is tagging the same causal variant across  
270 that population. The UK Biobank was selected as replication cohort as it is a large population-based  
271 sample that was expected to be genetically similar to the GS:SFHS discovery cohort. This was  
272 confirmed by the similarity of the observed haplotype frequencies (Table 2) between the two cohorts.  
273 The prevalence of MDD observed in the discovery cohort (13.7%) was comparable to that reported  
274 (14.6%) within similar populations.<sup>34</sup> However, in the replication cohort, the trait prevalence was  
275 notably higher (34.0%), most likely due to the differing methods of phenotypic ascertainment.  
276 Additional work could seek to replicate the findings in further cohorts, as well as full meta-analysis of  
277 all haplotypes within those cohorts. An additive model was used to analyse the haplotypes and  
278 alternative approaches could implement a dominant model or an analysis of diplotypes (haplotype  
279 pairs) for association with MDD.

## 280 **Conclusions**

281 This study identified two haplotypes within the discovery cohort that exceeded genome-wide  
282 significance for association with a clinically diagnosed MDD phenotype. One of these haplotypes was  
283 nominally significant in the replication cohort and was in LD with a haplotype that was genome-wide  
284 significant in the meta-analysis. The genome-wide significant haplotype on chromosome 6 was  
285 located on 6q21, which has been shown previously to be related to psychiatric disorders. There were a  
286 number of haplotypes approaching genome-wide significance located within genic regions associated  
287 with diseases that are comorbid with MDD and therefore these regions warrant further investigation.

288 The total genetic variance explained by the haplotypes identified was small, however these haplotypes  
289 potentially represent biologically informative aetiological subtypes for MDD and merit further  
290 analysis.

## 291 **ACKNOWLEDGEMENTS**

292 Generation Scotland received core funding from the Chief Scientist Office of the Scottish  
293 Government Health Directorate CZD/16/6 and the Scottish Funding Council HR03006. Genotyping  
294 of GS:SFHS was carried out by the Genetics Core Laboratory at the Wellcome Trust Clinical  
295 Research Facility, Edinburgh, Scotland and was funded by the UK's Medical Research Council and  
296 the Wellcome Trust (Wellcome Trust Strategic Award "Stratifying Resilience and Depression  
297 Longitudinally" (STRADL) (Reference 104036/Z/14/Z).

298 We are grateful to all the families who took part, the general practitioners and the Scottish School of  
299 Primary Care for their help in recruiting them, and the whole Generation Scotland team, which  
300 includes interviewers, computer and laboratory technicians, clerical workers, research scientists,  
301 volunteers, managers, receptionists, healthcare assistants and nurses. Ethics approval for the study  
302 was given by the NHS Tayside committee on research ethics (reference 05/S1401/8)

303 This research has been conducted using the UK Biobank resource – application number 4844; we are  
304 grateful to UK Biobank participants. The UK Biobank study was conducted under generic approval  
305 from the NHS National Research Ethics Service (approval letter dated 17th June 2011, Ref  
306 11/NW/0382).

307 YZ acknowledges support from China Scholarship Council. IJD is supported by the Centre for  
308 Cognitive Ageing and Cognitive Epidemiology which is funded by the Medical Research Council and  
309 the Biotechnology and Biological Sciences Research Council (MR/K026992/1). AMMcI and T-KC  
310 acknowledges support from the Dr Mortimer and Theresa Sackler Foundation.

## 311 **CONFLICT OF INTEREST**

312 DJP and IJP are participants in UK Biobank. The authors report that no other financial interests or  
313 potential conflicts of interest exist.

## 314 REFERENCES

- 315 1. Huffman JC, Celano CM, Beach SR, Motiwala SR, Januzzi JL. Depression and cardiac  
316 disease: epidemiology, mechanisms, and diagnosis. *Cardiovascular Psychiatry and*  
317 *Neurology* 2013; **2013**: 14.
- 318  
319 2. Kang H-J, Kim S-Y, Bae K-Y, Kim S-W, Shin I-S, Yoon J-S, *et al.* Comorbidity of  
320 depression with physical disorders: research and clinical implications. *Chonnam Medical*  
321 *Journal* 2015; **51**(1): 8-18.
- 322  
323 3. Raison CL, Capuron L, Miller AH. Cytokines sing the blues: inflammation and the  
324 pathogenesis of depression. *Trends in Immunology* 2006; **27**(1): 24-31.
- 325  
326 4. Major Depressive Disorder Working Group of the Psychiatric Gwas Consortium. A mega-  
327 analysis of genome-wide association studies for major depressive disorder. *Molecular*  
328 *Psychiatry* 2013; **18**(4): 497-511.
- 329  
330 5. Converge Consortium. Sparse whole-genome sequencing identifies two loci for major  
331 depressive disorder. *Nature* 2015; **523**(7562): 588-591.
- 332  
333 6. Levinson DF, Mostafavi S, Milaneschi Y, Rivera M, Ripke S, Wray NR, *et al.* Genetic  
334 studies of major depressive disorder: why are there no genome-wide association study  
335 findings and what can we do about it? *Biological Psychiatry* 2014; **76**(7): 510-512.
- 336  
337 7. Hyde CL, Nagle MW, Tian C, Chen X, Paciga SA, Wendland JR, *et al.* Identification of 15  
338 genetic loci associated with risk of major depression in individuals of European descent.  
339 *Nature Genetics* 2016; **advance online publication**.
- 340  
341 8. Lubke GH, Hottenga JJ, Walters R, Laurin C, de Geus EJC, Willemsen G, *et al.* Estimating  
342 the genetic variance of major depressive disorder due to all single nucleotide polymorphisms.  
343 *Biological Psychiatry* 2012; **72**(8): 707-709.
- 344  
345 9. Sullivan PF, Neale MC, Kendler KS. Genetic epidemiology of major depression: review and  
346 meta-analysis. *American Journal of Psychiatry* 2000; **157**(10): 1552-1562.
- 347  
348 10. Zhang Z, Ni J, Zhang J, Tang W, Li X, Wu Z, *et al.* A haplotype in the 5'-upstream region of  
349 the NDUFV2 gene is associated with major depressive disorder in Han Chinese. *Journal of*  
350 *Affective Disorders* 2016; **190**: 329-332.
- 351  
352 11. Kim J-J, Mandelli L, Pae C-U, De Ronchi D, Jun T-Y, Lee C, *et al.* Is there protective  
353 haplotype of dysbindin gene (DTNBP1) 3 polymorphisms for major depressive disorder.  
354 *Progress in Neuro-Psychopharmacology and Biological Psychiatry* 2008; **32**(2): 375-379.

- 355  
356 12. Klok MD, Giltay EJ, Van der Does AJW, Geleijnse JM, Antypa N, Penninx BWJH, *et al.* A  
357 common and functional mineralocorticoid receptor haplotype enhances optimism and protects  
358 against depression in females. *Translational Psychiatry* 2011; **1**: e62.
- 359  
360 13. Smith BH, Campbell A, Linksted P, Fitzpatrick B, Jackson C, Kerr SM, *et al.* Cohort profile:  
361 Generation Scotland: Scottish Family Health Study (GS:SFHS). The study, its participants  
362 and their potential for genetic research on health and illness. *International Journal of*  
363 *Epidemiology* 2013; **42**(3): 689-700.
- 364  
365 14. Smith DJ, Nicholl BI, Cullen B, Martin D, Ul-Haq Z, Evans J, *et al.* Prevalence and  
366 characteristics of probable major depression and bipolar disorder within UK Biobank: cross-  
367 sectional study of 172,751 participants. *PLoS ONE* 2013; **8**(11): e75362.
- 368  
369 15. Amador C, Huffman J, Trochet H, Campbell A, Porteous D, Wilson JF, *et al.* Recent genomic  
370 heritage in Scotland. *BMC Genomics* 2015; **16**(1): 1-17.
- 371  
372 16. Allen NE, Sudlow C, Peakman T, Collins R. UK biobank data: come and get it. *Science*  
373 *Translational Medicine* 2014; **6**(224): 224ed224.
- 374  
375 17. Marchini J (2015). UK Biobank phasing and imputation documentation. Version 1.2:  
376 [http://biobank.ctsu.ox.ac.uk/crystal/docs/impute\\_ukb\\_v1.pdf](http://biobank.ctsu.ox.ac.uk/crystal/docs/impute_ukb_v1.pdf).
- 377  
378 18. Delaneau O, Zagury J-F, Marchini J. Improved whole-chromosome phasing for disease and  
379 population genetic studies. *Nature Methods* 2013; **10**(1): 5-6.
- 380  
381 19. O'Connell J, Gurdasani D, Delaneau O, Pirastu N, Ulivi S, Cocca M, *et al.* A general  
382 approach for haplotype phasing across the full spectrum of relatedness. *PLoS Genetics* 2014;  
383 **10**(4): e1004234.
- 384  
385 20. The International HapMap Consortium. A second generation human haplotype map of over  
386 3.1 million SNPs. *Nature* 2007; **449**(7164): 851-861.
- 387  
388 21. Browning BL, Browning SR. Improving the accuracy and efficiency of identity-by-descent  
389 detection in population data. *Genetics* 2013; **194**(2): 459-471.
- 390  
391 22. Purcell S, Neale B, Todd-Brown K, Thomas L, Ferreira Manuel A, Bender D, *et al.* PLINK: a  
392 tool set for whole-genome association and population-based linkage analyses. *American*  
393 *Journal of Human Genetics* 2007; **81**(3): 559-575.
- 394  
395 23. Sham PC, Purcell SM. Statistical power and significance testing in large-scale genetic studies.  
396 *Nat Rev Genet* 2014; **15**(5): 335-346.
- 397  
398 24. First MB, Spitzer RL, Gibbon Miriam., Williams JBW (2002). Structured Clinical Interview  
399 for DSM-IV-TR Axis I Disorders, Research Version, Patient Edition. (SCID-I/P)

- 400  
401 25. Fernandez-Pujals AM, Adams MJ, Thomson P, McKechnie AG, Blackwood DHR, Smith  
402 BH, *et al.* Epidemiology and heritability of major depressive disorder, stratified by age of  
403 onset, sex, and illness course in generation scotland: scottish family health study (GS:SFHS).  
404 *PLoS ONE* 2015; **10**(11): e0142197.
- 405  
406 26. Information Services Division (2016). SMR Data Manual: [http://www.ndc.scot.nhs.uk/Data-](http://www.ndc.scot.nhs.uk/Data-Dictionary/SMR-Datasets)  
407 [Dictionary/SMR-Datasets](http://www.ndc.scot.nhs.uk/Data-Dictionary/SMR-Datasets).
- 408  
409 27. Yang J, Zaitlen NA, Goddard ME, Visscher PM, Price AL. Advantages and pitfalls in the  
410 application of mixed-model association methods. *Nature Genetics* 2014; **46**(2): 100-106.
- 411  
412 28. Yang J, Benyamin B, McEvoy BP, Gordon S, Henders AK, Nyholt DR, *et al.* Common SNPs  
413 explain a large proportion of the heritability for human height. *Nature Genetics* 2010; **42**(7):  
414 565-569.
- 415  
416 29. Zaitlen N, Kraft P, Patterson N, Pasaniuc B, Bhatia G, Pollack S, *et al.* Using extended  
417 genealogy to estimate components of heritability for 23 quantitative and dichotomous traits.  
418 *PLoS Genetics* 2013; **9**(5): e1003520.
- 419  
420 30. Bulik-Sullivan BK, Loh P-R, Finucane HK, Ripke S, Yang J, Schizophrenia Working Group  
421 of the Psychiatric Genomics Consortium, *et al.* LD score regression distinguishes  
422 confounding from polygenicity in genome-wide association studies. *Nature Genetics* 2015;  
423 **47**(3): 291-295.
- 424  
425 31. Willer CJ, Li Y, Abecasis GR. METAL: fast and efficient meta-analysis of genomewide  
426 association scans. *Bioinformatics* 2010; **26**(17): 2190-2191.
- 427  
428 32. Park J-H, Wacholder S, Gail MH, Peters U, Jacobs KB, Chanock SJ, *et al.* Estimation of  
429 effect size distribution from genome-wide association studies and implications for future  
430 discoveries. *Nature Genetics* 2010; **42**(7): 570-575.
- 431  
432 33. Purcell S, Cherny SS, Sham PC. Genetic power calculator: design of linkage and association  
433 genetic mapping studies of complex traits. *Bioinformatics* 2003; **19**(1): 149-150.
- 434  
435 34. Bromet E, Andrade LH, Hwang I, Sampson NA, Alonso J, de Girolamo G, *et al.* Cross-  
436 national epidemiology of DSM-IV major depressive episode. *BMC Medicine* 2011; **9**(1): 1-  
437 16.
- 438  
439 35. Kasper D, Planells-Cases R, Fuhrmann JC, Scheel O, Zeitz O, Ruether K, *et al.* Loss of the  
440 chloride channel CIC-7 leads to lysosomal storage disease and neurodegeneration. *The EMBO*  
441 *Journal* 2005; **24**(5): 1079-1091.
- 442  
443 36. Pandruvada SNM, Beauregard J, Benjannet S, Pata M, Lazure C, Seidah NG, *et al.* Role of  
444 ostml cytosolic complex with kinesin 5B in intracellular dispersion and trafficking.  
445 *Molecular and Cellular Biology* 2016; **36**(3): 507-521.



- 446  
447 37. Hoek KS, Schlegel NC, Eichhoff OM, Widmer DS, Praetorius C, Einarsson SO, *et al.* Novel  
448 MITF targets identified using a two-step DNA microarray strategy. *Pigment Cell &*  
449 *Melanoma Research* 2008; **21**(6): 665-676.
- 450  
451 38. Maes M, DeJonckheere C, Vandervorst C, Schotte C, Cosyns P, Raus J, *et al.* Abnormal  
452 pituitary function during melancholia: Reduced  $\alpha$ -melanocyte-stimulating hormone secretion  
453 and increased intact ACTH non-suppression. *Journal of Affective Disorders* 1991; **22**(3): 149-  
454 157.
- 455  
456 39. Goyal SN, Kokare DM, Chopde CT, Subhedar NK. Alpha-melanocyte stimulating hormone  
457 antagonizes antidepressant-like effect of neuropeptide Y in Porsolt's test in rats.  
458 *Pharmacology Biochemistry and Behavior* 2006; **85**(2): 369-377.
- 459  
460 40. Kokare DM, Singru PS, Dandekar MP, Chopde CT, Subhedar NK. Involvement of alpha-  
461 melanocyte stimulating hormone ( $\alpha$ -MSH) in differential ethanol exposure and withdrawal  
462 related depression in rat: Neuroanatomical-behavioral correlates. *Brain Research* 2008; **1216**:  
463 53-67.
- 464  
465 41. Knight J, Rochberg NS, Saccone SF, Nurnberger JI, Rice JP. An investigation of candidate  
466 regions for association with bipolar disorder. *American Journal of Medical Genetics Part B:*  
467 *Neuropsychiatric Genetics* 2010; **153B**(7): 1292-1297.
- 468  
469 42. Dick DM, Foroud T, Flury L, Bowman ES, Miller MJ, Rau NL, *et al.* Genomewide linkage  
470 analyses of bipolar disorder: a new sample of 250 pedigrees from the national institute of  
471 mental health genetics initiative. *American Journal of Human Genetics* 2003; **73**(1): 107-114.
- 472  
473 43. Park N, Juo SH, Cheng R, Liu J, Loth JE, Lilliston B, *et al.* Linkage analysis of psychosis in  
474 bipolar pedigrees suggests novel putative loci for bipolar disorder and shared susceptibility  
475 with schizophrenia. *Molecular Psychiatry* 2004; **9**(12): 1091-1099.
- 476  
477 44. Pato CN, Pato MT, Kirby A, Petryshen TL, Medeiros H, Carvalho C, *et al.* Genome-wide  
478 scan in Portuguese Island families implicates multiple loci in bipolar disorder: Fine mapping  
479 adds support on chromosomes 6 and 11. *American Journal of Medical Genetics Part B:*  
480 *Neuropsychiatric Genetics* 2004; **127B**(1): 30-34.
- 481  
482 45. Fabbri C, Serretti A. Genetics of long-term treatment outcome in bipolar disorder. *Progress in*  
483 *Neuro-Psychopharmacology and Biological Psychiatry* 2016; **65**: 17-24.
- 484  
485 46. McGuffin P, Rijsdijk F, Andrew M, Sham P, Katz R, Cardno A. The heritability of bipolar  
486 affective disorder and the genetic relationship to unipolar depression. *Archives of General*  
487 *Psychiatry* 2003; **60**(5): 497-502.
- 488  
489 47. Surh CD, Sprent J. Homeostasis of Naive and Memory T Cells. *Immunity* 2008; **29**(6): 848-  
490 862.
- 491



- 492 48. Kittipatarin C, Khaled AR. Interlinking interleukin-7. *Cytokine* 2007; **39**(1): 75-83.  
493  
494 49. Miller AH. Depression and immunity: A role for T cells? *Brain, Behavior, and Immunity*  
495 2010; **24**(1): 1-8.
- 496  
497 50. Simon NM, McNamara K, Chow CW, Maser RS, Papakostas GI, Pollack MH, *et al.* A  
498 detailed examination of cytokine abnormalities in major depressive disorder. *European*  
499 *Neuropsychopharmacology* 2008; **18**(3): 230-233.
- 500  
501 51. Lehto SM, Huotari A, Niskanen L, Herzig K-H, Tolmunen T, Viinamäki H, *et al.* Serum IL-7  
502 and G-CSF in major depressive disorder. *Progress in Neuro-Psychopharmacology and*  
503 *Biological Psychiatry* 2010; **34**(6): 846-851.
- 504  
505 52. Stewart JC, Rand KL, Muldoon MF, Kamarck TW. A prospective evaluation of the  
506 directionality of the depression-inflammation relationship. *Brain, Behavior, and Immunity*  
507 2009; **23**(7): 936-944.
- 508  
509 53. Irwin MR, Miller AH. Depressive disorders and immunity: 20 years of progress and  
510 discovery. *Brain, Behavior, and Immunity* 2007; **21**(4): 374-383.
- 511  
512 54. Aragam N, Wang K-S, Pan Y. Genome-wide association analysis of gender differences in  
513 major depressive disorder in the Netherlands NESDA and NTR population-based samples.  
514 *Journal of Affective Disorders* 2011; **133**(3): 516-521.
- 515  
516 55. Sullivan PF, de Geus EJC, Willemsen G, James MR, Smit JH, Zandbelt T, *et al.* Genome-  
517 wide association for major depressive disorder: a possible role for the presynaptic protein  
518 piccolo. *Molecular Psychiatry* 2008; **14**(4): 359-375.
- 519  
520 56. Boraska V, Davis OSP, Cherkas LF, Helder SG, Harris J, Krug I, *et al.* Genome-wide  
521 association analysis of eating disorder-related symptoms, behaviors, and personality traits.  
522 *American Journal of Medical Genetics* 2012; **159B**(7): 803-811.
- 523  
524 57. Hawley SP, Wills MKB, Rabalski AJ, Bendall AJ, Jones N. Expression patterns of ShcD and  
525 Shc family adaptor proteins during mouse embryonic development. *Developmental Dynamics*  
526 2011; **240**(1): 221-231.
- 527  
528 58. You Y, Li W, Gong Y, Yin B, Qiang B, Yuan J, *et al.* ShcD interacts with TrkB via its PTB  
529 and SH2 domains and regulates BDNF-induced MAPK activation. *BMB Rep* 2010; **43**(7):  
530 485-490.
- 531  
532 59. Duric V, Banasr M, Licznarski P, Schmidt HD, Stockmeier CA, Simen AA, *et al.* A negative  
533 regulator of MAP kinase causes depressive behavior. *Nature Medicine* 2010; **16**(11): 1328-  
534 1332.
- 535

536 **Figure 1.** Manhattan plot representing the  $-\log_{10} P$ -values for an association between each assessed  
537 haplotype in the Generation Scotland: Scottish Family Health Study cohort and Major Depressive  
538 Disorder

539

540 **Figure 2.** Regional association plot representing the  $-\log_{10} P$ -values for an association between  
541 haplotypes in the Generation Scotland: Scottish Family Health Study cohort and Major Depressive  
542 Disorder within the 107.4 – 107.6 Mb region on chromosome 6. The start and end position (using  
543 build GRCh37) of haplotypes represent the outermost SNP positions within the windows examined.  
544 The warmth of colour represents the  $r^2$  with the genome-wide significant haplotype located between  
545 108 338 267 and 108 454 437 bp.

546

547 **Figure 3.** Region association plot representing the  $-\log_{10} P$ -values for an association between  
548 haplotypes in the Generation Scotland: Scottish Family Health Study cohort and Major Depressive  
549 Disorder within the 3.6 – 5.8 Mb region on chromosome 10. The start and end position (using build  
550 GRCh37) of haplotypes represent the outermost SNP positions within the windows examined. The  
551 warmth of colour represents the  $r^2$  with the genome-wide significant haplotype located between 4 588  
552 261 and 4 822 210 bp.

553

554

555

556

557

558

559

560

561

562

563

564

565

566

567

568

569

570

571

572

573

574

575

576

577

578

579

580

581

582

583

584

585

586

587

588

589 **Table 1.** The genetic association between Major Depressive Disorder and 12 haplotypes in the  
 590 Generation Scotland: Scottish Family Health Study (GS:SFHS) discovery cohort (where  $P < 10^{-6}$ ), the  
 591 replication cohort (UK Biobank) and a meta-analysis.

| Haplotype |                       |                  | GS:SFHS                   |                               | UK Biobank                |                               | Meta-analysis             |                               |
|-----------|-----------------------|------------------|---------------------------|-------------------------------|---------------------------|-------------------------------|---------------------------|-------------------------------|
| Chr.      | Position (bp)         | Window Size (cM) | Odds Ratio (95% CI)       | P-value                       | Odds Ratio (95% CI)       | P-value                       | Odds Ratio (95% CI)       | P-value                       |
| 6 *       | 108338267 - 108454437 | 0.34             | <b>1.83 (1.53 - 2.16)</b> | <b>7.06 x 10<sup>-9</sup></b> | <b>1.11 (1.01 - 1.22)</b> | <b>3.62 x 10<sup>-2</sup></b> | 1.26 (1.16 - 1.37)        | 3.14 x 10 <sup>-7</sup>       |
|           | 108407662 - 108454437 | 0.25             | 1.68 (1.42 - 1.96)        | 8.17 x 10 <sup>-8</sup>       | <b>1.14 (1.04 - 1.24)</b> | <b>4.47 x 10<sup>-3</sup></b> | <b>1.25 (1.16 - 1.35)</b> | <b>4.38 x 10<sup>-8</sup></b> |
| 7         | 139682412 - 139708901 | 0.25             | 2.17 (1.67 - 2.73)        | 4.37 x 10 <sup>-7</sup>       | 0.87 (0.68 - 1.08)        | 2.20 x 10 <sup>-1</sup>       | 1.28 (1.08 - 1.49)        | 4.67 x 10 <sup>-3</sup>       |
| 8         | 79700362 - 80387861   | 0.5              | 1.98 (1.56 - 2.46)        | 9.02 x 10 <sup>-7</sup>       | 1.06 (0.86 - 1.28)        | 5.93 x 10 <sup>-1</sup>       | 1.36 (1.18 - 1.56)        | 6.29 x 10 <sup>-5</sup>       |
|           | 79759499 - 80156474   | 0.25             | 1.77 (1.47 - 2.10)        | 7.90 x 10 <sup>-8</sup>       | 1.05 (0.91 - 1.21)        | 5.06 x 10 <sup>-1</sup>       | 1.28 (1.15 - 1.42)        | 1.14 x 10 <sup>-5</sup>       |
| 10        | 4588261 - 4822210     | 0.5              | <b>2.33 (1.83 - 2.91)</b> | <b>8.50 x 10<sup>-9</sup></b> | 1.15 (0.80 - 1.59)        | 4.39 x 10 <sup>-1</sup>       | 1.67 (1.40 - 1.98)        | 7.92 x 10 <sup>-8</sup>       |
| 11 *      | 2260854 - 2437425     | 0.41             | 1.64 (1.38 - 1.91)        | 2.86 x 10 <sup>-7</sup>       | 1.00 (0.87 - 1.34)        | 9.91 x 10 <sup>-1</sup>       | 1.26 (1.10 - 1.34)        | 1.32 x 10 <sup>-4</sup>       |
| 12        | 48159721 - 48263828   | 0.25             | 2.00 (1.58 - 2.47)        | 4.78 x 10 <sup>-7</sup>       | 0.97 (0.79 - 1.17)        | 7.36 x 10 <sup>-1</sup>       | 1.29 (1.12 - 1.48)        | 6.51 x 10 <sup>-4</sup>       |
| 12        | 116904503 - 117062860 | 0.25             | 2.13 (1.64 - 2.69)        | 9.90 x 10 <sup>-7</sup>       | 1.04 (0.79 - 1.34)        | 7.79 x 10 <sup>-1</sup>       | 1.45 (1.22 - 1.71)        | 5.37 x 10 <sup>-5</sup>       |
| 15        | 49206902 - 49260601   | 0.25             | 2.03 (1.62 - 2.48)        | 9.21 x 10 <sup>-8</sup>       | 1.09 (0.88 - 1.32)        | 4.04 x 10 <sup>-1</sup>       | 1.41 (1.22 - 1.61)        | 4.39 x 10 <sup>-6</sup>       |
| 15        | 93806447 - 93851224   | 0.5              | 1.58 (1.34 - 1.83)        | 4.47 x 10 <sup>-7</sup>       | 0.93 (0.81 - 1.05)        | 2.38 x 10 <sup>-1</sup>       | 1.16 (1.05 - 1.27)        | 2.50 x 10 <sup>-3</sup>       |
|           | 93821340 - 93845622   | 0.25             | 1.52 (1.31 - 1.75)        | 8.67 x 10 <sup>-7</sup>       | 0.91 (0.81 - 1.03)        | 1.37 x 10 <sup>-1</sup>       | 1.13 (1.03 - 1.23)        | 6.97 x 10 <sup>-3</sup>       |

592 **Bold values indicate genome-wide statistical significance ( $P < 5 \times 10^{-8}$ ) was achieved in the GS:SFHS**  
 593 **cohort or the meta-analysis, or that nominal statistical significance ( $P < 0.05$ ) was achieved in the UK**  
 594 **Biobank. Base pair (bp) positions are based on build GRCh37. \* indicates haplotype boundaries**  
 595 **defined by the fine mapping approach. { indicates linkage disequilibrium ( $r^2$ ) > 0.5 between**  
 596 **haplotypes in the GS:SFHS cohort.**

597

598

599

600

601

602

603

604

605

606

607

608

609

610

611

612

613

614

615 **Table 2.** Protein coding genes located overlapping with the 12 haplotypes with  $P < 10^{-6}$  in the  
 616 Generation Scotland: Scottish Family Health Study (GS:SFHS) discovery cohort and the frequencies  
 617 of those haplotypes in GS:SFHS and UK Biobank.

| Chr. | Position (bp) | Protein coding genes  | Haplotype frequency                         |            |        |
|------|---------------|-----------------------|---------------------------------------------|------------|--------|
|      |               |                       | GS:SFHS                                     | UK Biobank |        |
| {    | 6             | 108338267 - 108454437 | OSTM1                                       | 0.0152     | 0.0197 |
|      | 6             | 108407662 - 108454437 | OSTM1                                       | 0.0193     | 0.0241 |
|      | 7             | 139682412 - 139708901 | TBXAS1                                      | 0.0066     | 0.0069 |
| {    | 8             | 79700362 - 80387861   | IL7                                         | 0.0076     | 0.0081 |
|      | 8             | 79759499 - 80156474   | IL7                                         | 0.0147     | 0.0157 |
|      | 10            | 4588261 - 4822210     |                                             | 0.0064     | 0.0027 |
|      | 11            | 2260854 - 2437425     | ASCL2, CLorf21, TSPAN32, CD81, TSSC4, TRPM5 | 0.0196     | 0.0187 |
|      | 12            | 48159721 - 48263828   | SLC48A1, RAPGEF3, HDAC7, VDR                | 0.0078     | 0.0090 |
|      | 12            | 116904503 - 117062860 | MAP1LC3B2                                   | 0.0057     | 0.0045 |
|      | 15            | 49206902 - 49260601   | SHC4                                        | 0.0082     | 0.0080 |
| {    | 15            | 93806447 - 93851224   |                                             | 0.0224     | 0.0206 |
|      | 15            | 93821340 - 93845622   |                                             | 0.0265     | 0.0243 |

618 Base pair (bp) positions are based on build GRCh37 with protein coding regions obtained from  
 619 Ensembl, GRCh37.p13. Haplotype frequencies were calculated using unrelated individuals and  
 620 excluding UK Biobank participants recruited in Glasgow or Edinburgh. { indicates a linkage  
 621 disequilibrium ( $r^2$ ) > 0.5 between haplotypes in the GS:SFHS cohort.

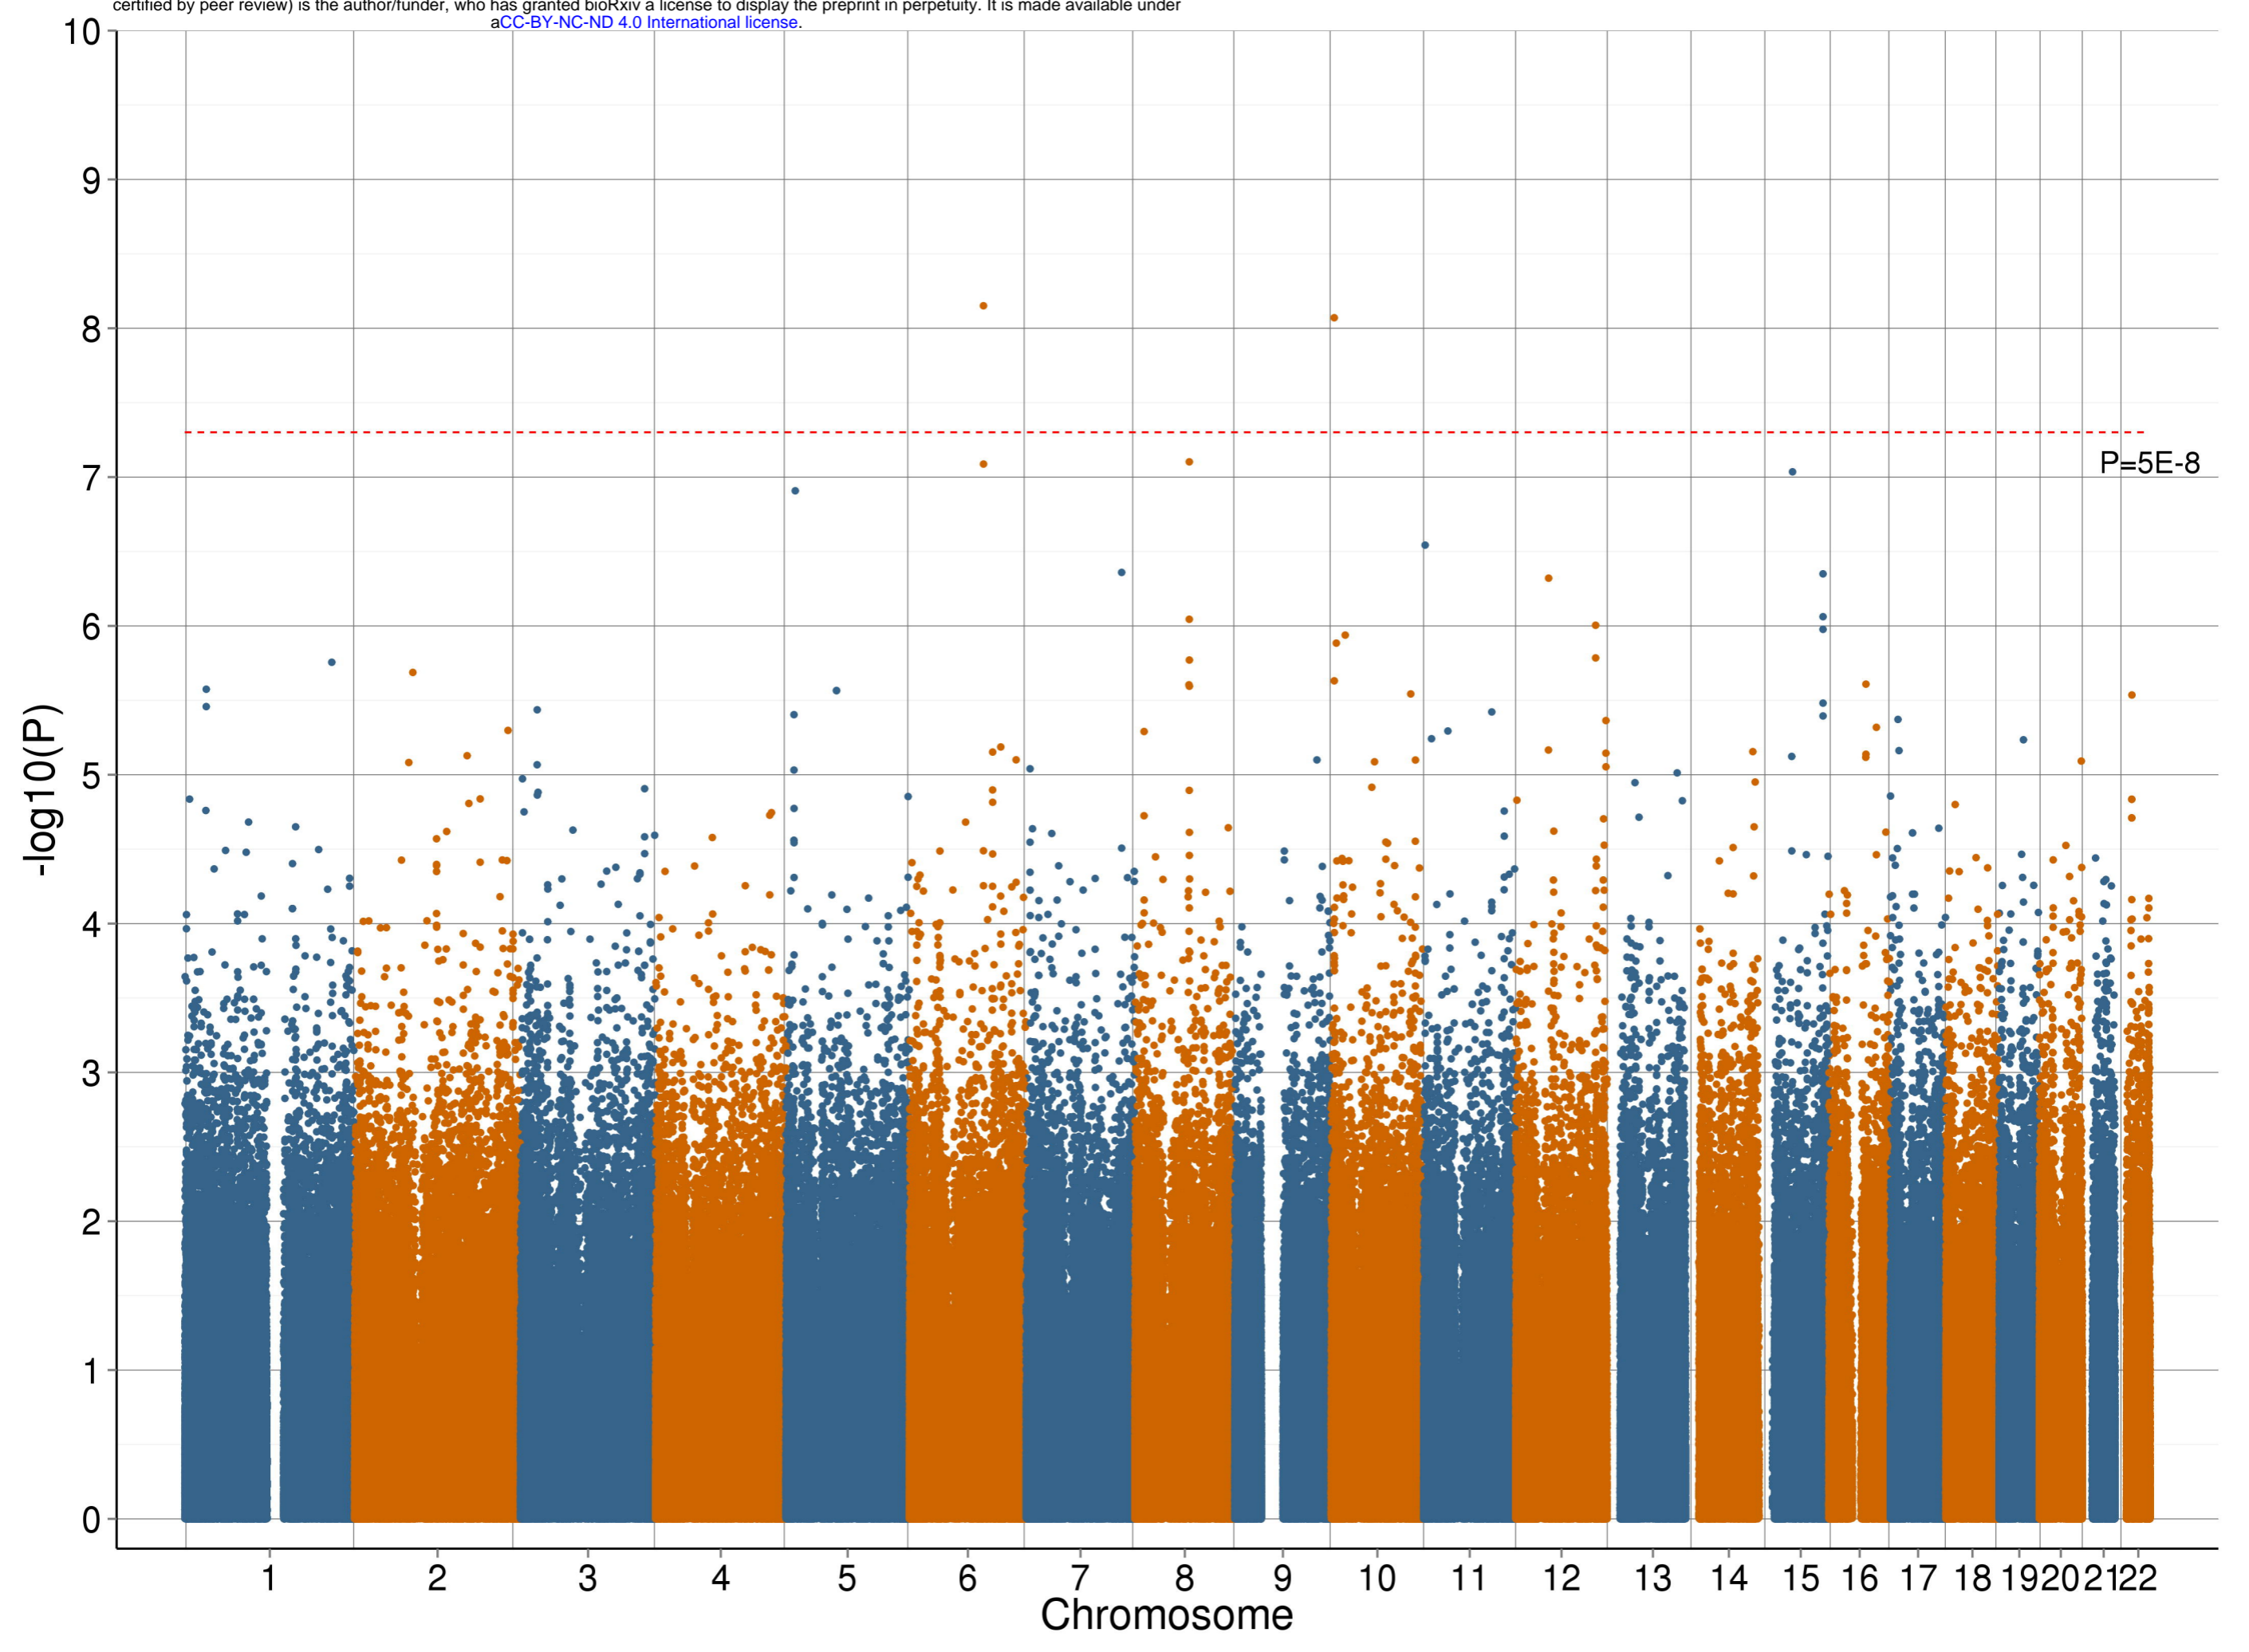



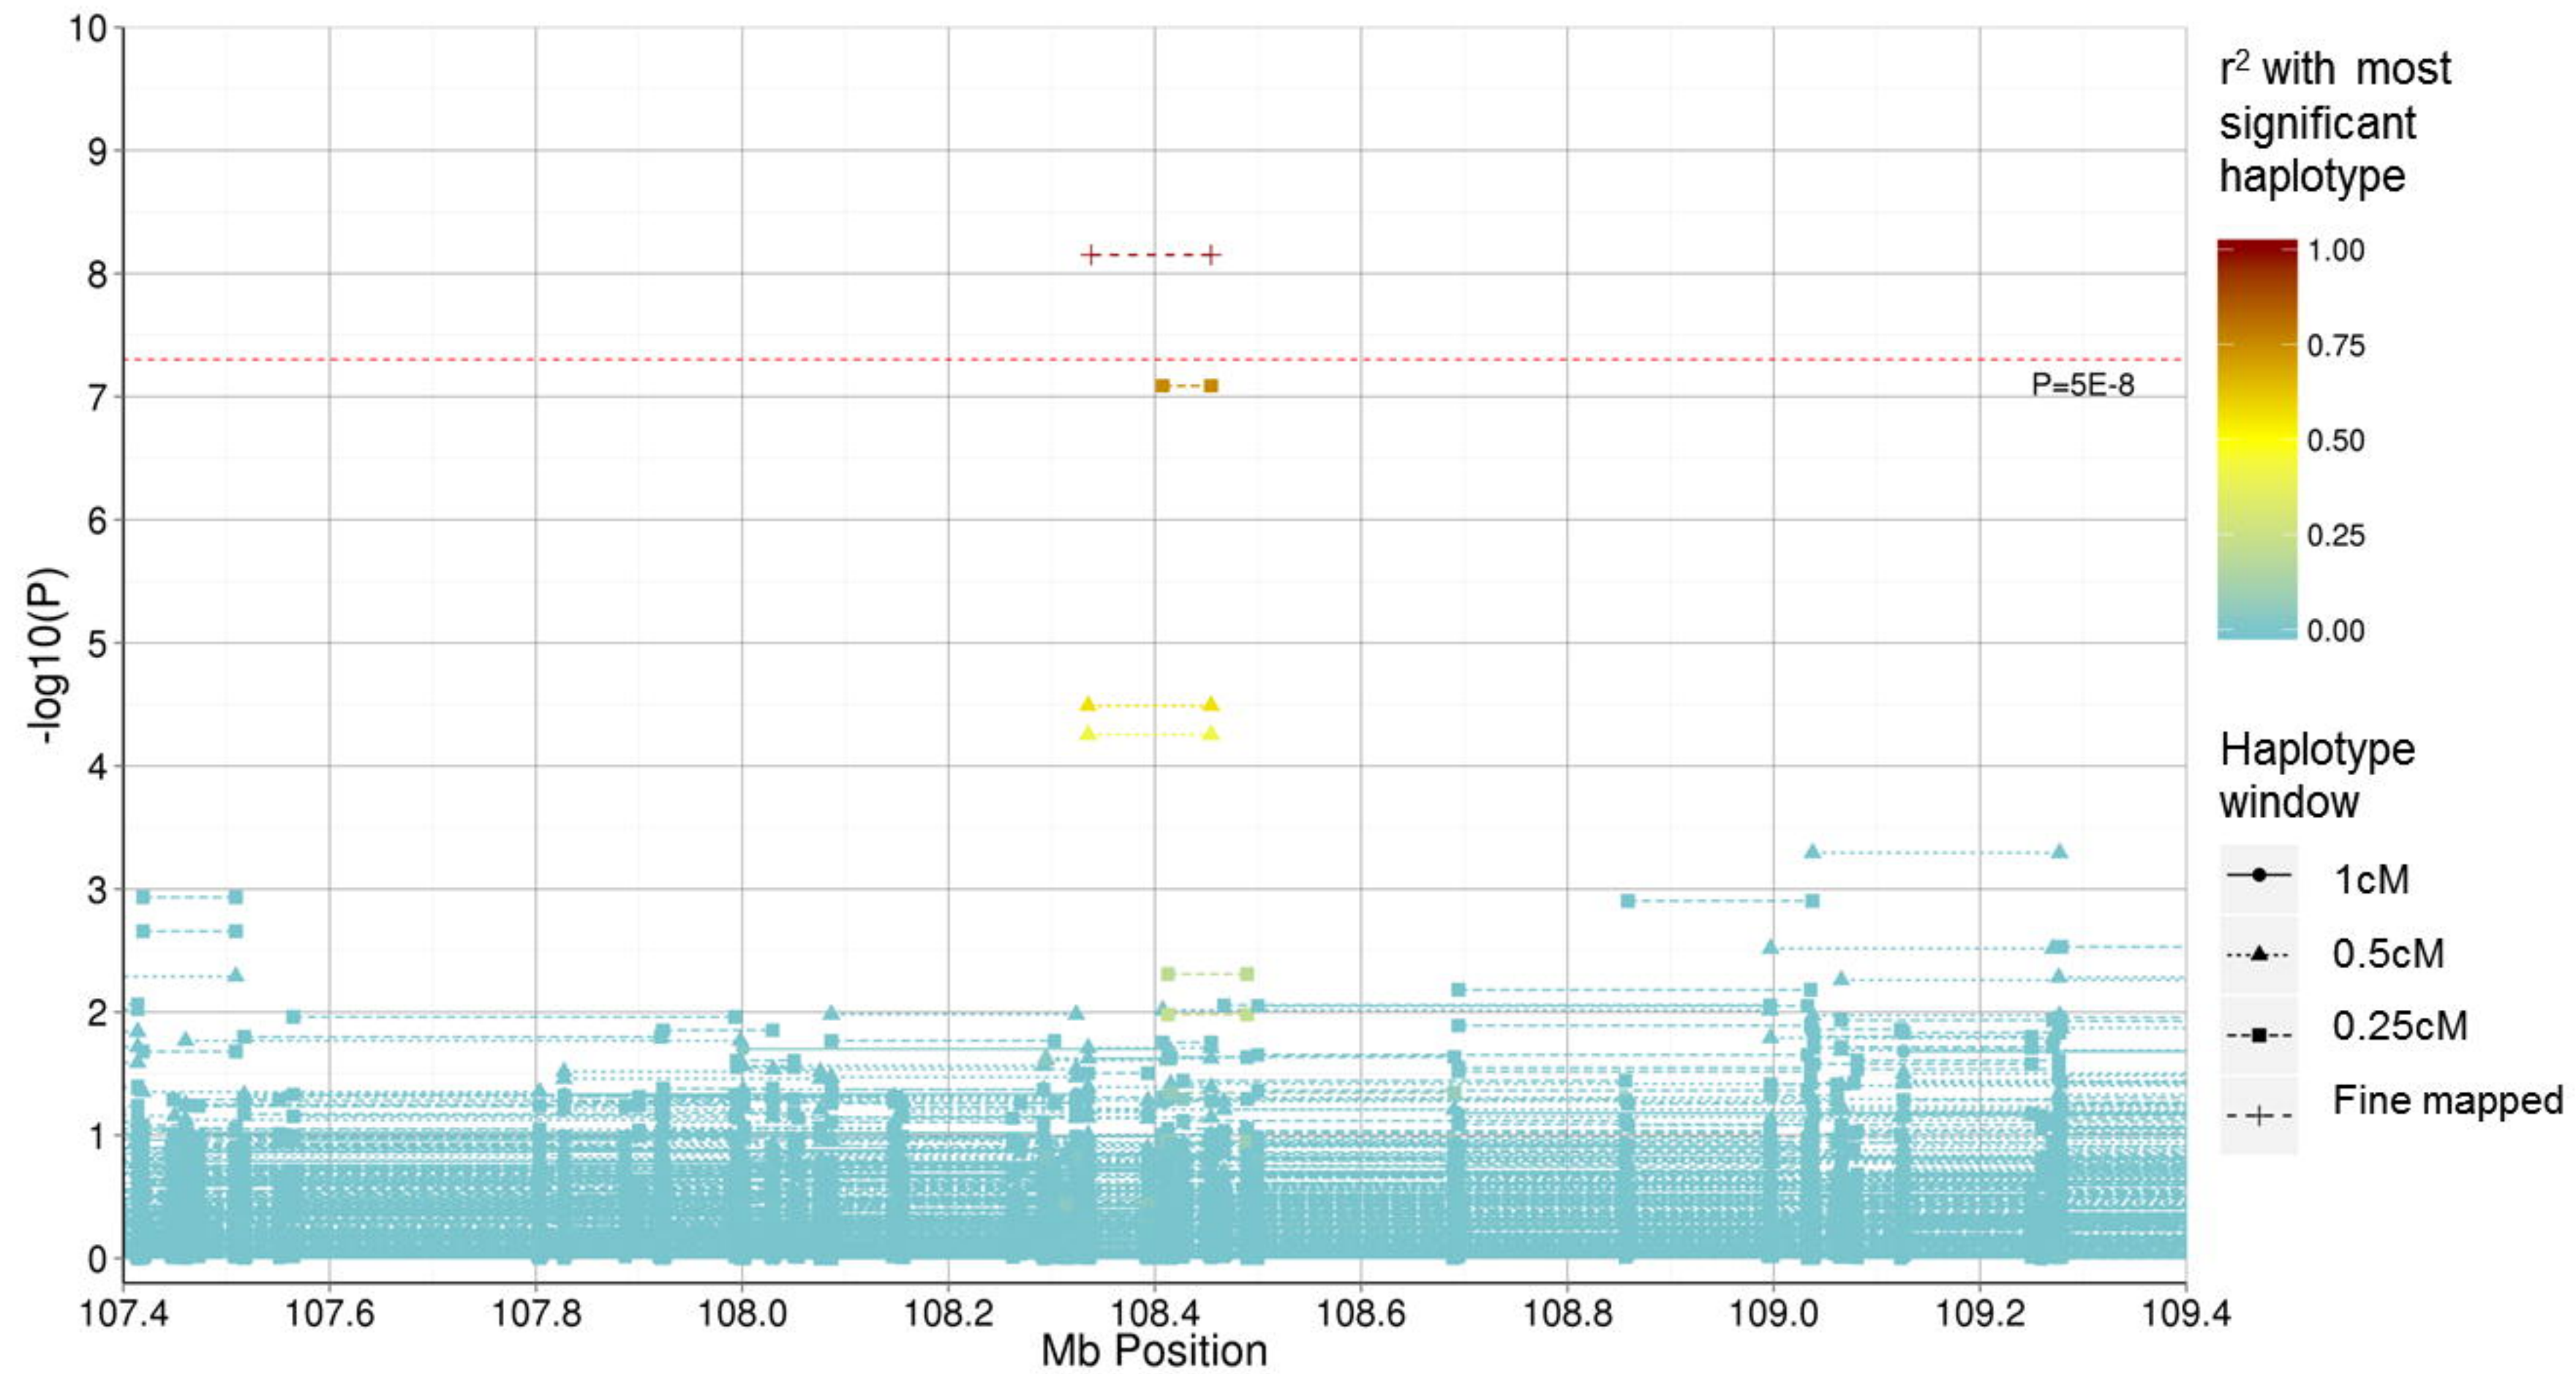



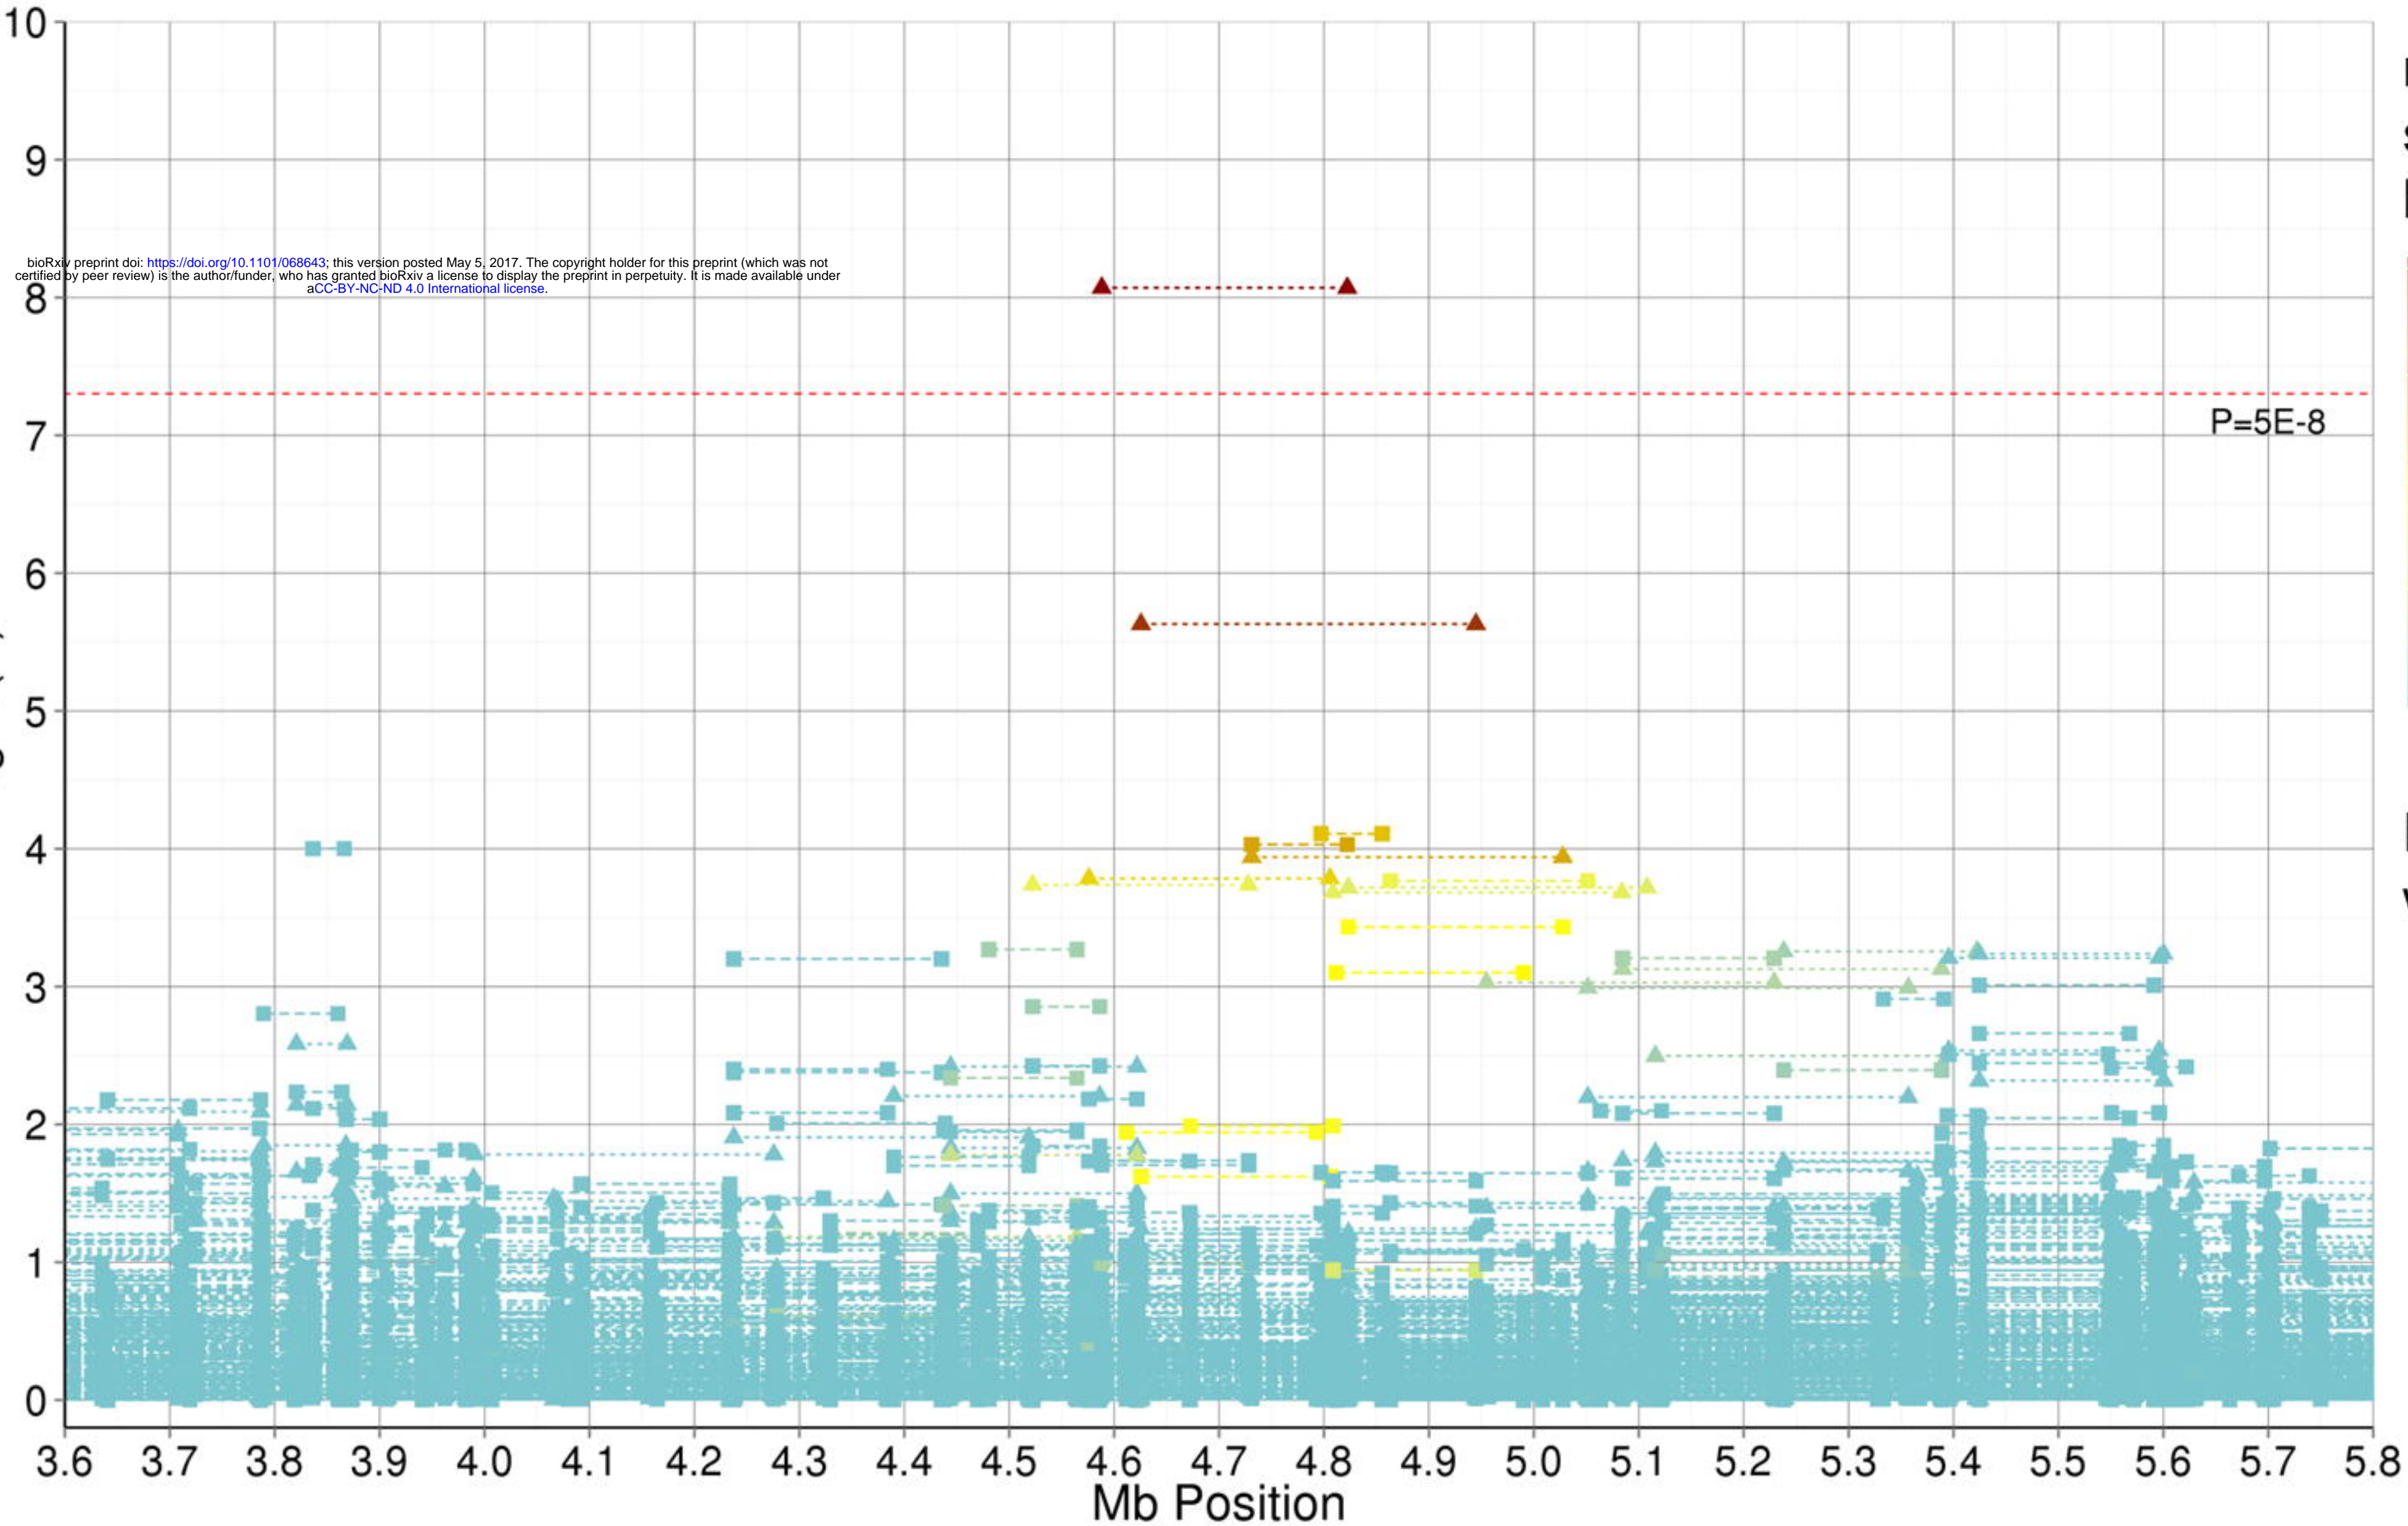

$r^2$  with most significant haplotype

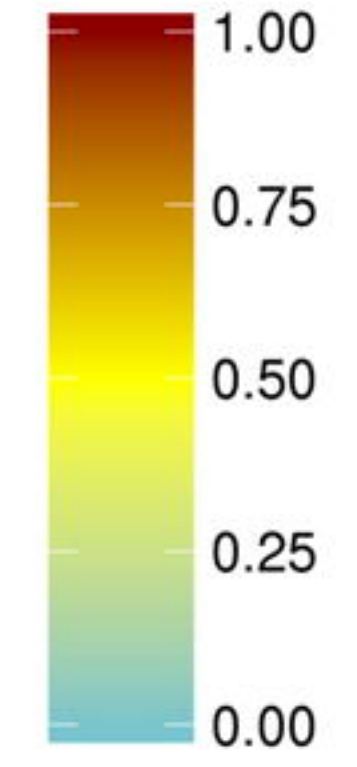

Haplotype window

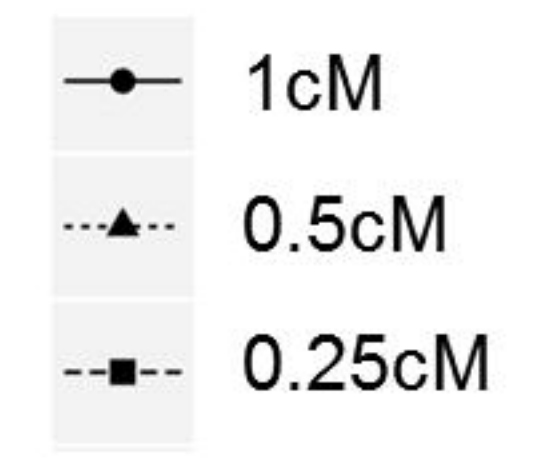

Source: http://biorxiv.org/content/10.1101/068643v2.full.pdf
